# Supplementary material
Source: publisher figshare collection journal article supplement (https://acs.figshare.com/ndownloader/files/4461604)
Supplement: Supplementary file 1 [file 4461604]

# Supporting Information

## Inverted Phases Induced by Chain Architecture in ABAC Tetrablock Terpolymers

Michael J. Bluemle,<sup>†</sup> Jingwen Zhang,<sup>†</sup> Timothy P. Lodge,<sup>†,‡</sup> and Frank S. Bates<sup>\*,†</sup>

<sup>†</sup>*Department of Chemical Engineering and Materials Science and* <sup>‡</sup>*Department of Chemistry*

*University of Minnesota, Minneapolis, MN 55455, USA*

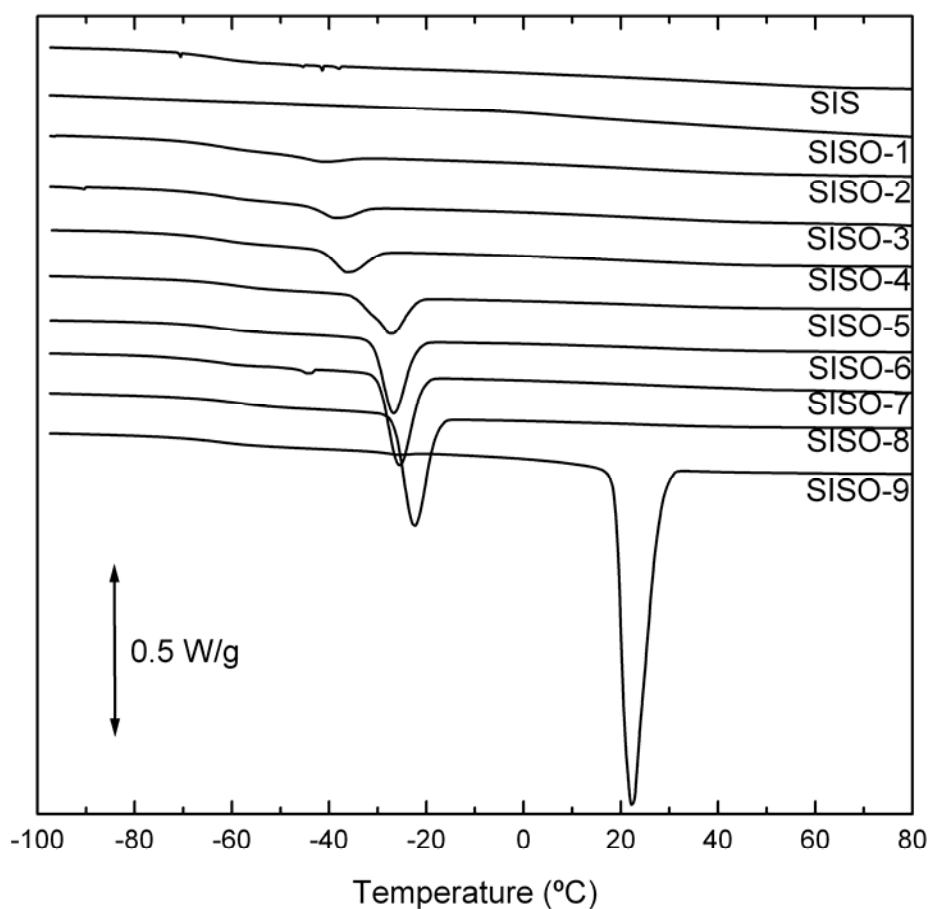

**Figure S.1** Cooling DSC scans (10 °C/min) of SIS triblock and SISO tetrablocks after heating to 150 °C.

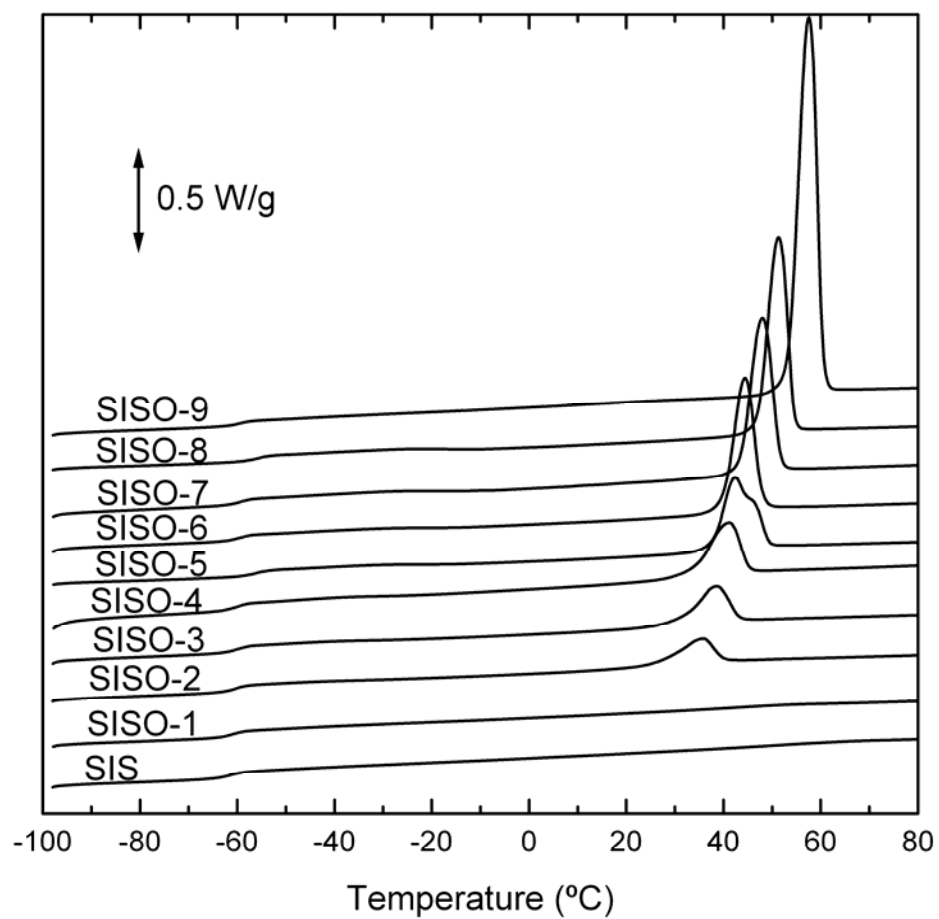

**Figure S.2** Heating DSC scans (10 °C/min) of SIS triblock and SISO tetrablocks after cooling to  $-100\text{ }^{\circ}\text{C}$  (data shown in Figure S.1).
